# Supplementary material for: Preparation of zinc oxide with a three-dimensionally interconnected macroporous structure via a sol–gel method accompanied by phase separation
Source: Royal Society of Chemistry journal article supplement (doi:10.1039/c9nj02373a), 2019-01-01
Supplement: c9nj02373a1.pdf [file c9nj02373a1.pdf]

## Supporting information

### Preparation of zinc oxide with three-dimensionally interconnected macroporous structure through sol-gel method accompanied by phase separation

Xuanming Lu<sup>1</sup> · Kazuyoshi Kanamori<sup>1</sup> · Kazuki Nakanishi<sup>1,2\*</sup>

<sup>1</sup>Department of Chemistry, Graduate School of Science, Kyoto University, Kitashirakawa, Sakyo-ku, Kyoto, Kyoto 606-8502, Japan

<sup>2</sup>Division of Materials Research, Institute of Materials and Systems for Sustainability, Nagoya University, Furo-cho, Chikusa-ku, Nagoya, Aichi 464-8601, Japan

E-mail: dknakanishi@imass.nagoya-u.ac.jp

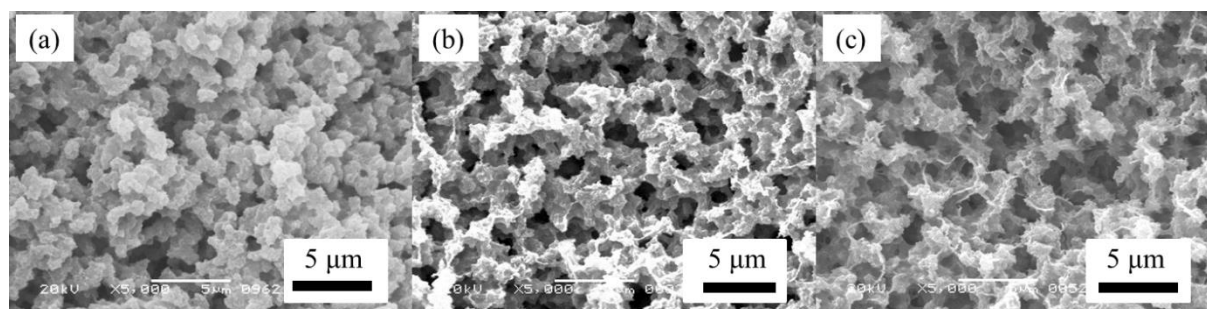

**Fig. S1** SEM images of as-dried gels prepared with varied amount of methanol when the amount of propylene oxide (PO) was fixed at 0.9 mL. The amounts of methanol (MeOH) were 0.8 mL (a), 0.6 mL (b), and 0.4 mL (c), respectively. ( $\text{Zn}(\text{NO}_3)_2$ : 2 mmol)

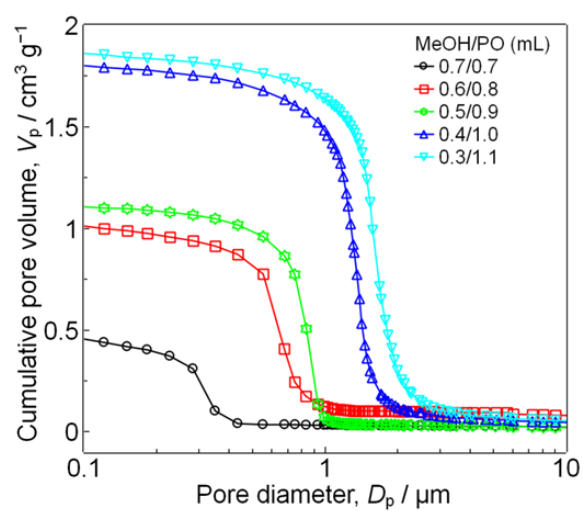

**Fig. S2** Cumulative pore volume curves of as-dried gels prepared with varied volume ratio of MeOH to PO, derived by mercury porosimetry measurement.

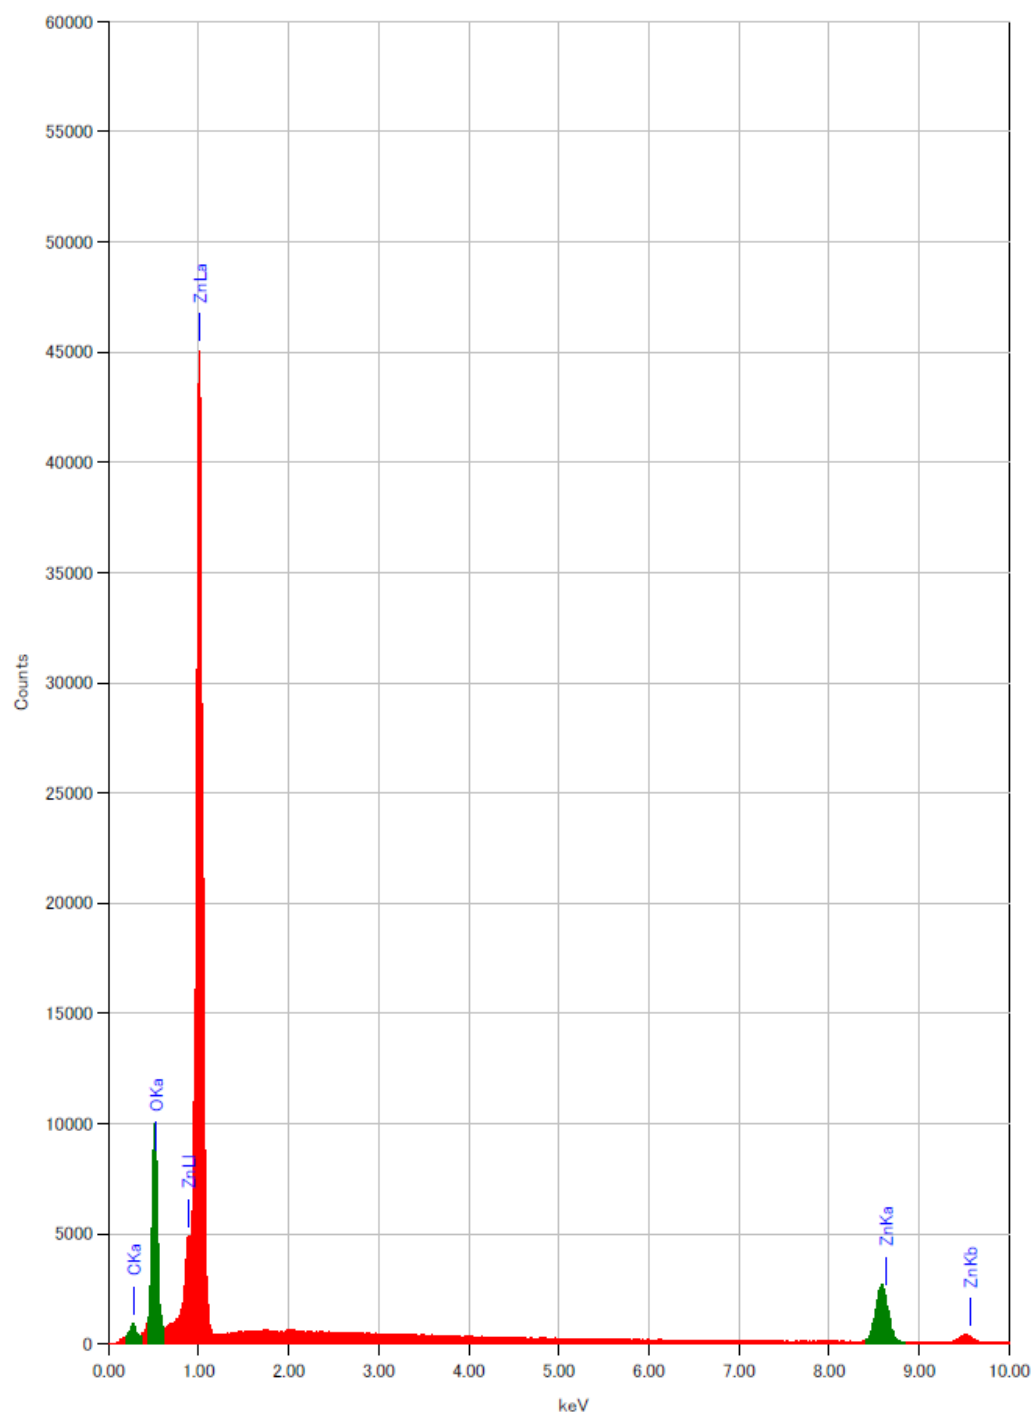

**Fig. S3** EDS result of sample (c) after heat-treated in air at 360 °C for 2 h.
